# Supplementary material for: Predicting Personal Exposure to PM2.5 Using Different Determinants and Machine Learning Algorithms in Two Megacities, China
Source: Hindawi journal article supplement (doi:10.1155/2024/5589891), 2024-01-01
Supplement: f1 [file 5589891.f1.pdf]

## Supplementary Material

### **Predicting personal exposure to PM<sub>2.5</sub> using different determinants and machine learning algorithms in two megacities, China**

**Na Li<sup>1</sup>, Yunpu Li<sup>1</sup>, Dongqun Xu<sup>1</sup>, Zhe Liu<sup>1</sup>, Ning Li<sup>2</sup>, Ryan Chartier<sup>3</sup>, Junrui Chang<sup>1</sup>, Qin**

**Wang<sup>1</sup>, Chunyu Xu<sup>1</sup>, \***

*<sup>1</sup>China CDC Key Laboratory of Environment and Population Health, National Institute of Environmental Health, Chinese Center for Disease Control and Prevention, Beijing 100021, China*

*<sup>2</sup>Nanjing Jiangning Center for Disease Control and Prevention, Nanjing 211100, China*

*<sup>3</sup>RTI International, Research Triangle Park, NC 27709, United State*

**Corresponding Author:**

\*Telephone: + 86 010 50930157, E-mail: xuchunyu@nieh.chinacdc.cn

**TABLE S1** Hyperparameters for tuning machine learning model

| <b>NO</b> | <b>Machine learning Algorithm</b> | <b>Hyperparameter</b>                                                                                                                                                                                                                             |
|-----------|-----------------------------------|---------------------------------------------------------------------------------------------------------------------------------------------------------------------------------------------------------------------------------------------------|
| 1         | Random forest                     | $n_{\text{tree}} = 500;$<br>$m_{\text{try}} = 1:(\text{number of candidate variables})$                                                                                                                                                           |
| 2         | Artificial neural network         | Decay = seq(0.01, 0.1, by=0.02);<br>size = 1:20                                                                                                                                                                                                   |
| 3         | Support vector machine            | $\sigma = c(0.01, 0.015, 0.1, 0.2, 0.4, 0.5, 0.8, 1, 2, 4);$<br>$C = c(0.01, 0.05, 0.1, 0.2, 0.25, 0.5, 1, 2, 4, 8, 16)$<br>$n_{\text{rounds}} = \text{seq}(100, 600, \text{by}=100);$<br>$\text{max\_depth} = 3:7;$<br>$\gamma = c(0.01, 0.02);$ |
| 4         | Extreme gradient boosting         | $\eta = c(0.05, 0.1, 1);$<br>$\text{colsample\_bytree} = 0.75;$<br>$\text{subsample} = 0.5;$<br>$\text{min\_child\_weight} = 0$<br>$\text{interaction.depth} = c(1:10);$                                                                          |
| 5         | Gradient boosting machine         | $n_{\text{trees}} = c(25, 50, 100, 150, 200, 250, 300);$<br>$\text{shrinkage} = c(0.05, 0.1, 0.2);$<br>$n_{\text{minobsinnode}} = c(2, 5, 10, 20, 30, 40)$                                                                                        |

**TABLE S2** The list of candidate predictors for 24-h average personal PM<sub>2.5</sub>

| NO                         | Variable                            | Type                 | Value                                                                                                                                                                                         |
|----------------------------|-------------------------------------|----------------------|-----------------------------------------------------------------------------------------------------------------------------------------------------------------------------------------------|
| <b>Routine monitoring</b>  |                                     |                      |                                                                                                                                                                                               |
| 1                          | Ambient PM <sub>2.5</sub>           | Continuous variable  | μg/m <sup>3</sup>                                                                                                                                                                             |
| 2                          | Outdoor temperature                 | Continuous variable  | °C                                                                                                                                                                                            |
| 3                          | Outdoor relative humidity           | Continuous variable  | %                                                                                                                                                                                             |
| 4                          | Wind speed                          | Continuous variable  | m/s                                                                                                                                                                                           |
| 5                          | Air pressure                        | Continuous variable  | hPa                                                                                                                                                                                           |
| <b>Basic questionnaire</b> |                                     |                      |                                                                                                                                                                                               |
| 6                          | Gender                              | Categorical variable | 0=Female; 1=Male                                                                                                                                                                              |
| 7                          | Age                                 | Continuous variable  | year                                                                                                                                                                                          |
| 8                          | Education degree                    | Categorical variable | 1 = Primary School and below<br>2 = Junior High School<br>3 = High School or Junior College<br>4 = College and above                                                                          |
| 9                          | Household income                    | Categorical variable | 1 = ≤50,000 RMB/year;<br>2 = 50,001~100,000 RMB /year;<br>3 = 100,001 ~ 150,000 RMB /year;<br>4 = 150,001 ~ 200,000 RMB /year;<br>5 = 200,001 ~ 250,000 RMB /year;<br>6 = > 250,000 RMB /year |
| 10                         | Number of children                  | Continuous variable  | n                                                                                                                                                                                             |
| 11                         | Number of family members            | Continuous variable  | n                                                                                                                                                                                             |
| 12                         | Number of pets                      | Continuous variable  | n                                                                                                                                                                                             |
| 13                         | Floors                              | Continuous variable  | n                                                                                                                                                                                             |
| 14                         | Building age                        | Continuous variable  | year                                                                                                                                                                                          |
| 15                         | Years since last housing renovation | Continuous variable  | year                                                                                                                                                                                          |
| 16                         | Distance to the nearest main road   | Continuous variable  | m                                                                                                                                                                                             |

|    |                                  |                      |                                                                             |
|----|----------------------------------|----------------------|-----------------------------------------------------------------------------|
| 17 | Room volume                      | Continuous variable  | m <sup>3</sup>                                                              |
| 18 | Cooking frequency                | Categorical variable | 1 = 3 times/day;<br>2 = 2 times/day;<br>3 = 1 times/day;<br>4 = none        |
| 19 | Duration of each cooking session | Categorical variable | 1 = <20 min;<br>2 = 20 ~ 40 min<br>3 = 40 ~ 60 min<br>4 = >60 min           |
| 20 | Room cleaning frequency          | Categorical variable | 1 = every day;<br>2 = every 2~3 days;<br>3 = every 4~5 days;<br>4 = weekly  |
| 21 | Windows opening number           | Continuous variable  | n                                                                           |
| 22 | Window opening width             | Categorical variable | 1 = <10%;<br>2 = 11% ~ 20%;<br>3 = 21% ~ 50%;<br>4 = 51% ~ 80%;<br>5 = >80% |
| 23 | Window opening time              | Continuous variable  | h                                                                           |
| 24 | Air conditioner use              | Continuous variable  | h                                                                           |

### Time-activity diary

|    |                             |                     |   |
|----|-----------------------------|---------------------|---|
| 25 | Time in transit             | Continuous variable | % |
| 26 | Time at home                | Continuous variable | % |
| 27 | Time in indoor public place | Continuous variable | % |
| 28 | Time outdoors               | Continuous variable | % |
| 29 | Exposure to ETS             | Continuous variable | % |
| 30 | Cooking time                | Continuous variable | % |
| 31 | Time percent of cleaning    | Continuous variable | % |

---

**TABLE S3** Residence, demographic, and activity characteristics of study subjects

|                                                     | <b>BJ</b>    | <b>NJ</b>     |
|-----------------------------------------------------|--------------|---------------|
| Monitored participants, <i>n</i>                    | 33           | 33            |
| Age (years)                                         | 62 (53, 86)  | 59 (43, 78)   |
| <b>Gender, <i>n</i>, (%)</b>                        |              |               |
| Female                                              | 19 (57.6)    | 19 (57.6)     |
| Male                                                | 14 (42.4)    | 14 (42.4)     |
| Building age (years)                                | 18 (5, 56)   | 11 (3, 32)    |
| Years since the latest decoration (years)           | 12 (0, 20)   | 7 (3, 32)     |
| Distance to the nearest major road (m)              | 45 (15, 354) | 108 (11, 380) |
| <b>Floor, <i>n</i>, (%)</b>                         |              |               |
| 1st–3rd                                             | 10 (30.3)    | 10 (30.3)     |
| 4th–9th                                             | 11 (33.3)    | 13 (39.4)     |
| ≥10th                                               | 12 (36.4)    | 10 (30.3)     |
| <b>Total household income (Yuan), <i>n</i>, (%)</b> |              |               |
| ≤50,000                                             | 4 (12.1)     | 3 (9.1)       |
| 50,001–100,000                                      | 11 (33.3)    | 10 (30.3)     |
| 100,001–150,000                                     | 12 (36.4)    | 15 (45.5)     |
| 150,001–200,000                                     | 3 (9.1)      | 1 (3.0)       |
| 200,001–250,000                                     | 2 (6.1)      | 4 (12.1)      |
| >250,000                                            | 1 (3.0)      | 0 (0)         |
| <b>Window opening width</b>                         |              |               |
| ≤10%                                                | 16 (5.9)     | 24 (8.1)      |
| 11%–20%                                             | 49 (18.1)    | 66 (22.2)     |
| 21%–50%                                             | 50 (18.5)    | 40 (13.5)     |
| 51%–80%                                             | 15 (5.5)     | 30 (10.1)     |
| >80%                                                | 141 (52.0)   | 137 (46.1)    |

|                                   |                     |                      |
|-----------------------------------|---------------------|----------------------|
| Window opening time (min/d)       | 480 (0, 1440)       | 840 (0, 1440)        |
| Have dog/cat, <i>n</i> , (%)      | 3 (9.1)             | 3 (9.1)              |
| Use air conditioner (min/d)       | 0 (0, 992)          | 0 (0, 697)           |
| Use air purifier (min/d)          | 0 (0, 1436)         | 0 (0, 609)           |
| ETS exposure time (min/d)         | 0 (0, 127)          | 0 (0, 276)           |
| Cooking time (min/d)              | 20 (0, 219)         | 40 (0, 225)          |
| Cleaning time (min/d)             | 0 (0, 239)          | 32 (0, 311)          |
| <b>Meteorological factors</b>     |                     |                      |
| Outdoor temperature (°C)          | 25.4 (-8.5, 29.7)   | 21.7 (4.0, 31.7)     |
| Outdoor relative humidity (RH, %) | 45.4 (11.9, 87.5)   | 62.8 (31.3, 83.2)    |
| Wind speed (m/s)                  | 2.1 (1.2, 5.2)      | 1.5 (0.7, 3.7)       |
| Air pressure (kPa)                | 100.5 (99.2, 104.0) | 101.7 (100.0, 103.4) |
| <b>Time-activity data (%)</b>     |                     |                      |
| <b>Indoors, total</b>             | 93.2 (55.0, 100.0)  | 95.0 (70.8, 100.0)   |
| Residence                         | 90.4 (53.9, 100.0)  | 92.8 (51.9, 100.0)   |
| Public building                   | 0.9 (0.0, 26.7)     | 1.1 (0.0, 31.1)      |
| <b>Transportation</b>             | 3.1 (0.0, 18.6)     | 1.9 (0.0, 23.4)      |
| <b>Outdoors, not in traffic</b>   | 1.7 (0.0, 35.6)     | 1.7 (0.0, 25.7)      |

Notes: Continuous variables are reported as median (min, max).

**TABLE S4** Importance scores of variables included in the final prediction models

| Data source                | Variable                   | BJ           |       |       |       |         |       | NJ   |       |       |       |         |       |
|----------------------------|----------------------------|--------------|-------|-------|-------|---------|-------|------|-------|-------|-------|---------|-------|
|                            |                            | MLR          | RF    | SVM   | GBM   | XGBoost | NNet  | MLR  | RF    | SVM   | GBM   | XGBoost | NNet  |
| <b>Routine monitoring</b>  | Ambient PM <sub>2.5</sub>  | 0.82         | 39.15 | 28.49 | 60.08 | 47.28   | 63.75 | 0.62 | 25.56 | 35.55 | 49.92 | 31.89   | 53.38 |
|                            | Air pressure               |              | 1.90  | 8.64  |       | 3.29    | 4.64  |      | 4.72  | 15.86 |       | 4.24    | 5.94  |
|                            | Outdoor RH                 | 0.08         | 8.65  | 12.26 | 5.93  | 8.46    | 9.04  | 0.12 | 5.34  |       |       |         | 5.32  |
|                            | Outdoor temperature        |              | 1.30  |       |       |         | 2.18  |      | 6.08  | 20.02 |       |         | 3.72  |
|                            | Wind speed                 |              | 2.65  | 12.18 |       |         | 2.62  | 0.11 | 2.99  |       | 5.40  |         | 2.47  |
| <b>Basic questionnaire</b> | Age                        |              |       |       | 2.83  |         |       |      |       |       |       |         | 2.80  |
|                            | Air conditioner use        | 0.16         |       |       | 4.27  | 1.95    | 6.35  | 0.08 |       |       |       |         |       |
|                            | Building age               |              |       |       | 3.01  |         |       |      |       |       |       |         |       |
|                            | Cleaning frequency         |              |       |       |       |         |       | 0.21 |       |       |       |         | 15.42 |
|                            | Cooking frequency          |              |       |       |       |         |       | 2.23 |       |       |       |         |       |
|                            | Education degree           |              |       |       |       |         |       | 2.88 |       |       |       |         |       |
|                            | Floors                     |              |       |       |       |         |       | 0.04 |       |       |       |         |       |
|                            | Household income           |              |       |       |       |         |       | 6.29 |       |       |       |         |       |
|                            | Window opening number      |              |       |       |       |         |       | 1.31 | 0.25  |       |       |         | 1.79  |
|                            | Window opening time        |              | 2.34  |       | 3.72  | 2.36    |       |      |       |       |       |         |       |
|                            | Window opening width       |              |       |       |       |         |       | 5.29 | 0.09  |       |       |         |       |
|                            | <b>Time-activity diary</b> | Cooking time | 0.21  | 3.41  |       | 4.56    | 4.81  |      | 0.10  |       |       |         |       |
| Exposure to ETS            |                            | 0.25         | 6.18  |       | 10.30 | 8.17    |       | 0.29 | 7.20  |       | 12.90 | 9.66    | 20.56 |

---

|                             |      |      |       |
|-----------------------------|------|------|-------|
| Time at home                |      |      | 41.37 |
| Time in indoor public place | 2.95 |      | 27.88 |
| Time in transit             |      | 1.95 | 31.97 |
| Time outdoors               | 3.25 |      | 32.14 |

---
